# Supplementary material
Source: Springer Nature journal article supplement (https://www.springermedizin.de/resource/supplementary/12943_2009_532_MOESM9_ESM.pdf/9554576)

**A**

|            |   |   |   |    |    |       |
|------------|---|---|---|----|----|-------|
| SDF-1      | + | + | + | +  | +  | +     |
| Time (min) | 0 | 2 | 5 | 10 | 30 | 5     |
| Inhibitor  | - | - | - | -  | -  | U0126 |

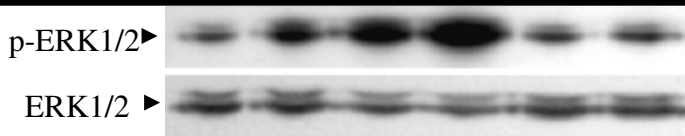

|           |   |   |   |   |   |          |
|-----------|---|---|---|---|---|----------|
| Inhibitor | - | - | - | - | - | SP600125 |
|-----------|---|---|---|---|---|----------|

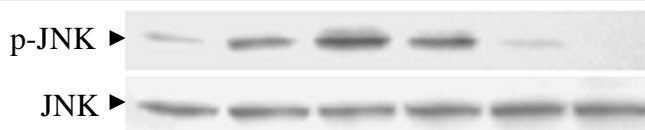

|            |   |    |    |    |     |          |
|------------|---|----|----|----|-----|----------|
| Time (min) | 0 | 10 | 30 | 60 | 120 | SB203580 |
|------------|---|----|----|----|-----|----------|

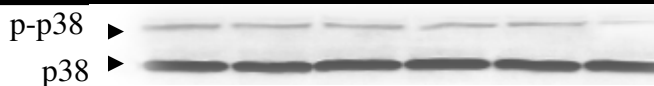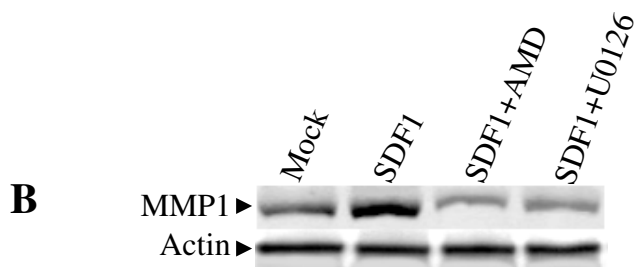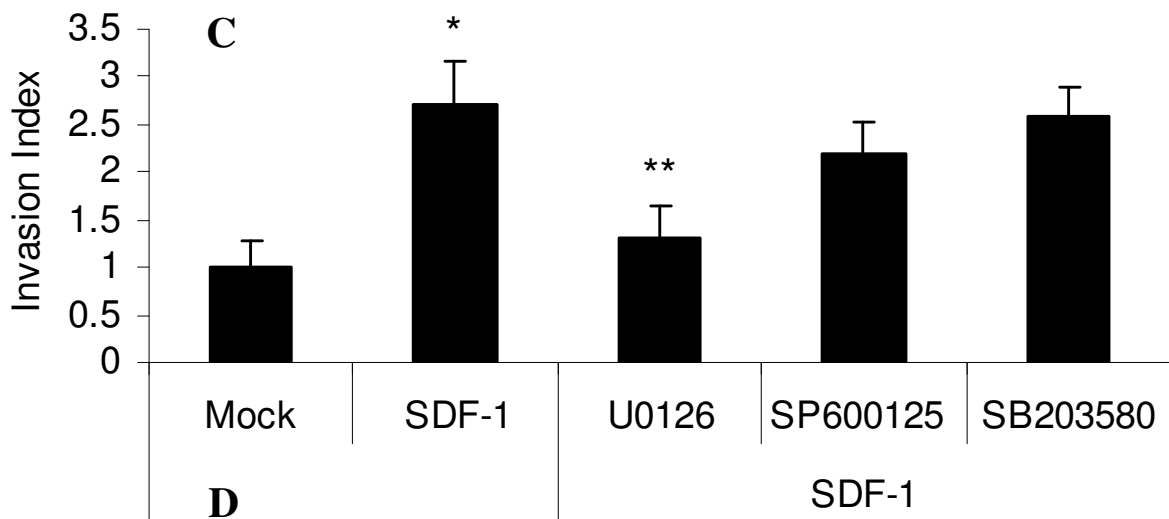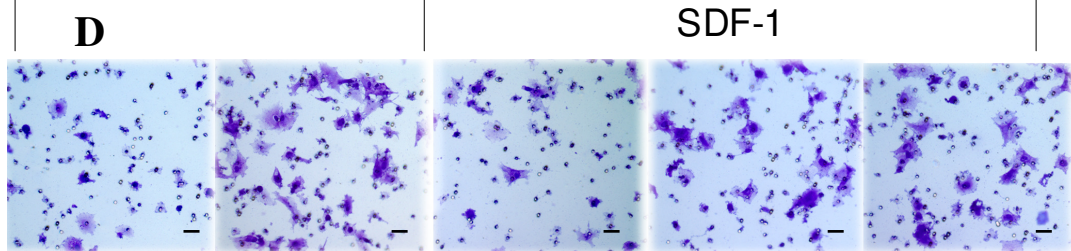

Supplement: MOESM9 [file 9554576]
